# Supplementary material
Source: PubMed Central journal article supplement (PMC5860836)
Supplement: DC171933SupplementaryData.pdf [file DC171933SupplementaryData.pdf]

SUPPLEMENTARY DATA

**Supplementary Table S1.** UK Biobank participants' characteristics by average lifetime night shift frequency (N=70,480). Characteristics are shown by average frequency of night shift work. Values are indicated in means ( $\pm$ standard deviation, SD), median ( $\pm$ inter-quartile range, IQR) or percentages (%).

|                                      | Average Frequency of Night Shifts per Month |                  |                    |                   |
|--------------------------------------|---------------------------------------------|------------------|--------------------|-------------------|
|                                      | None                                        | <3/months        | 3-7/months         | $\geq$ 8/month    |
| <i>N</i>                             | 53,586                                      | 2,261            | 6,969              | 7,664             |
| Age (yrs)                            | 53.0 (6.8)                                  | 52.9 (6.9)       | 51.8 (6.6)         | 52.6 (6.8)        |
| Sex (% male)                         | 41                                          | 57               | 49                 | 58                |
| European (%)                         | 97.1                                        | 95.0             | 96.2               | 96.1              |
| Single (%)                           | 16.1                                        | 17.1             | 15.9               | 16.4              |
| Townsend Index                       | -2.4 (-3.8- -0.17)                          | -2.3 (-3.6-0.04) | -2.3 (-3.8- -0.06) | -2.1 (-3.6- 0.42) |
| Weekly work hours                    | 34.6 (12.4)                                 | 36.2 (12.1)      | 36.3 (12.1)        | 37.5 (12.6)       |
| Family history of T2D (%)            | 19.9                                        | 22.3             | 21.5               | 23.0              |
| Body Mass Index (kg/m <sup>2</sup> ) | 26.4 (4.5)                                  | 27.1 (4.6)       | 27.1 (4.7)         | 27.7 (4.7)        |
| Never smoker (%)                     | 62.6                                        | 54.6             | 57.6               | 52.5              |
| Physical activity (MET-h/week)       | 25.3 (12.1-43.4)                            | 27.9 (13.3-53.3) | 28.9 (14.6-54.8)   | 29.2(15.6-62.2)   |
| Daily alcohol consumption (%)        | 22.0                                        | 22.0             | 19.4               | 19.4              |
| Sleep duration (h)                   | 7.1 (0.9)                                   | 7.1 (0.9)        | 7.1 (0.9)          | 7.0 (1.0)         |
| Late chronotype (%)                  | 8.4                                         | 8.9              | 9.0                | 10.5              |
| Hypertension (%)                     | 16.9                                        | 19.5             | 17.1               | 19.4              |
| Antihypertensive medication use (%)  | 10.9                                        | 12.9             | 10.8               | 12.8              |
| Elevated cholesterol levels (%)      | 6.1                                         | 7.6              | 6.7                | 7.8               |
| Lipid-lowering medication use (%)    | 7.3                                         | 9.1              | 8.1                | 9.7               |
| Statin use (%)                       | 6.4                                         | 8.2              | 7.1                | 8.7               |
| Corticosteroid use (%)               | 0.4                                         | 0.3              | 0.3                | 0.5               |

SUPPLEMENTARY DATA

**Supplementary Table S2.** UK Biobank genetic sample's characteristics by current night shift work exposure (N=180,704). Characteristics are shown by average frequency of night shift work. Values are indicated in means ( $\pm$ standard deviation, SD), median ( $\pm$ inter-quartile range, IQR) or percentages (%).

|                                      | Current Work Schedule |                                              |                                               |                                              |                        |
|--------------------------------------|-----------------------|----------------------------------------------|-----------------------------------------------|----------------------------------------------|------------------------|
|                                      | Day workers           | Shift Work, But only rarely, if ever, nights | Irregular or rotating shifts with some nights | Irregular/ rotating shifts with usual nights | Permanent night shifts |
| N                                    | 151,657               | 14,445                                       | 8,292                                         | 2,157                                        | 4,153                  |
| Age (yrs)                            | 52.9 (7.0)            | 52.5 (7.0)                                   | 51.2 (6.8)                                    | 50.9 (6.6)                                   | 51.4 (6.7)             |
| Sex (% male)                         | 47                    | 48                                           | 63                                            | 65                                           | 63                     |
| European (%)                         | 100                   | 100                                          | 100                                           | 100                                          | 100                    |
| Single (%)                           | 15                    | 19                                           | 19                                            | 19                                           | 18                     |
| Townsend Index                       | -1.7 (-3.7-0.1)       | -0.9 (-3.3-1.0)                              | -1.0 (-3.4-0.9)                               | -0.9 (-1.6-1.1)                              | -0.8 (-3.2-1.25)       |
| Weekly work hours                    | 34.8 (12.4)           | 35.9 (12.0)                                  | 40.7 (12.6)                                   | 40.5 (12.3)                                  | 40.2 (12.8)            |
| Family history of T2D (%)            | 20.2                  | 22.2                                         | 22.4                                          | 21.6                                         | 23.2                   |
| Body Mass Index (kg/m <sup>2</sup> ) | 27.0 (4.6)            | 27.7 (4.9)                                   | 28.1 (4.8)                                    | 28.1 (4.8)                                   | 28.5 (4.8)             |
| Never smoker (%)                     | 58.9                  | 53.5                                         | 52.9                                          | 52.8                                         | 50.7                   |
| Physical activity (MET-h/week)       | 43.0 (12.6-48.5)      | 63.1 (17.4-79.2)                             | 68.1 (20.2-87.6)                              | 67.0 (20.1-86.2)                             | 73.5 (23.3-96.0)       |
| Daily alcohol consumption (%)        | 21                    | 18                                           | 18                                            | 16                                           | 11                     |
| Sleep duration (h)                   | 7.0 (0.92)            | 7.0 (1.0)                                    | 6.9 (1.0)                                     | 6.9 (1.1)                                    | 6.8 (1.1)              |
| Late chronotype (%)                  | 7.7                   | 7.6                                          | 9.5                                           | 12.0                                         | 16.3                   |
| Hypertension (%)                     | 18.8                  | 20.2                                         | 19.8                                          | 20.2                                         | 21.0                   |
| Antihypertensive medication use (%)  | 12.3                  | 13.0                                         | 12.8                                          | 12.6                                         | 13.7                   |

SUPPLEMENTARY DATA

|                                   |     |     |     |     |     |
|-----------------------------------|-----|-----|-----|-----|-----|
| Elevated cholesterol levels (%)   | 6.9 | 7.4 | 7.3 | 6.9 | 8.0 |
| Lipid-lowering medication use (%) | 8.4 | 9.0 | 9.1 | 8.8 | 9.6 |
| Statin use (%)                    | 7.4 | 8.0 | 8.0 | 7.7 | 8.6 |
| Corticosteroid use (%)            | 0.4 | 0.5 | 0.5 | 0.4 | 0.2 |

SUPPLEMENTARY DATA

**Supplementary Table S3.** UK Biobank genetic sample's characteristics by average lifetime night shift frequency (N=44,141). Characteristics are shown by average frequency of night shift work. Values are indicated in means ( $\pm$ standard deviation, SD), median ( $\pm$ inter-quartile range, IQR) or percentages (%).

|                                      | Average Frequency of Night Shifts per Month |                  |                   |                   |
|--------------------------------------|---------------------------------------------|------------------|-------------------|-------------------|
|                                      | None                                        | <3/months        | 3-7/months        | $\geq$ 8/month    |
| <i>N</i>                             | 33,714                                      | 1,391            | 4,303             | 4,733             |
| Age (yrs)                            | 53.0 (6.7)                                  | 53.1 (6.7)       | 51.9 (6.6)        | 52.6 (6.8)        |
| Sex (% male)                         | 41                                          | 56               | 48                | 58                |
| European (%)                         | 100                                         | 100              | 100               | 100               |
| Single (%)                           | 15.9                                        | 16.0             | 15.1              | 15.8              |
| Townsend Index                       | -1.8 (-3.8-0.44)                            | -1.7 (-3.8-0.37) | -1.8 (-3.8-0.33)  | -1.5 (-3.7-0.15)  |
| Weekly work hours                    | 34.5 (12.3)                                 | 36.2 (11.8)      | 36.1 (12.0)       | 37.4 (12.8)       |
| Family history of T2D                | 19.4                                        | 20.3             | 20.1              | 22.9              |
| Body Mass Index (kg/m <sup>2</sup> ) | 26.4 (4.4)                                  | 27.2 (4.5)       | 27.2 (4.8)        | 27.7 (4.7)        |
| Never smoker (%)                     | 63.0                                        | 55.1             | 57.7              | 51.7              |
| Physical activity (MET-h/week)       | 36.6 (12.0-43.6)                            | 46.7 (13.1-55.1) | 47.1 (14.6- 55.1) | 52.8 (15.4- 63.0) |
| Daily alcohol consumption (%)        | 22.4                                        | 21.7             | 19.3              | 19.8              |
| Sleep duration (h)                   | 7.1 (0.8)                                   | 7.1 (0.9)        | 7.1 (0.9)         | 7.0 (1.0)         |
| Late chronotype (%)                  | 8.9                                         | 10.3             | 9.9               | 11.3              |
| Hypertension (%)                     | 17.0                                        | 21.0             | 17.3              | 19.2              |
| Antihypertensive medication use (%)  | 11.0                                        | 13.4             | 10.8              | 12.5              |
| Elevated cholesterol levels (%)      | 6.0                                         | 7.9              | 6.4               | 7.8               |
| Lipid-lowering medication use (%)    | 7.3                                         | 9.6              | 7.9               | 9.7               |
| Statin use (%)                       | 6.4                                         | 8.7              | 6.9               | 8.6               |
| Corticosteroid use (%)               | 0.4                                         | 0.2              | 0.4               | 0.5               |

SUPPLEMENTARY DATA

**Supplementary Table S4. Association of current shift work and type 2 diabetes odds by sex.** OR=odds ratio, 95%CI= 95% confidence interval.

| Shift Work Status                                                    | OR <sup>g</sup> 95%CI | P for interaction |
|----------------------------------------------------------------------|-----------------------|-------------------|
| <b>Men</b> (N=129,117, 4,557 cases)                                  |                       |                   |
| No current shift work (N=100,631, 3,463 cases)                       | 1.00 (Ref)            | 0.34              |
| Shift work, but never, rarely night shift work (N=10,459, 470 cases) | 1.10 (0.98-1.24)      |                   |
| Sometimes night shift work (N=8,078, 336 cases)                      | 1.06 (0.93-1.21)      |                   |
| Usually night shift work (N=2,259, 126 cases)                        | 1.35 (1.08-1.67)      |                   |
| Always night shift work (N=3,997, 162 cases)                         | 1.02 (0.84-1.23)      |                   |
| <b>Women</b> (N=142,233, 2,213 cases)                                |                       |                   |
| No current shift work (N=119,124, 1,710 cases)                       | 1.00 (Ref)            | 0.34              |
| Shift work, but never, rarely night shift work (N=11,983, 260 cases) | 1.13 (0.97-1.32)      |                   |
| Sometimes night shift work (N=5,020, 125 cases)                      | 1.33 (1.06-1.65)      |                   |
| Usually night shift work (N=1,326, 43 cases)                         | 1.42 (0.97-2.05)      |                   |
| Always night shift work (N=2,567, 75 cases)                          | 1.27 (0.95-1.66)      |                   |

**Supplementary Table S5. Association of current shift work and type 2 diabetes odds by ethnicity-specific obesity status.** OR=odds ratio, 95%CI= 95% confidence interval.

| Shift Work Status                              | OR, 95%CI        | P <sub>interaction</sub> |
|------------------------------------------------|------------------|--------------------------|
| <b>Non-obese</b> (N=202,449, 2,563 T2D cases)  |                  |                          |
| No current shift work                          | 1.00 (Ref)       | 0.21                     |
| Shift work, but never, rarely night shift work | 1.19 (1.02-1.37) |                          |
| Sometimes night shift work                     | 1.10 (0.91-1.32) |                          |
| Usually night shift work                       | 1.72(1.25-2.31)  |                          |
| Always night shift work                        | 1.12 (0.86-1.44) |                          |
| <b>Obese</b> (N=61,345, 4,147 T2D cases)       |                  |                          |
| No current shift work                          | 1.00 (Ref)       | 0.21                     |
| Shift work, but never, rarely night shift work | 1.07 (0.95-1.20) |                          |
| Sometimes night shift work                     | 1.09 (0.95-1.26) |                          |
| Usually night shift work                       | 1.22 (0.96-1.54) |                          |
| Always night shift work                        | 1.05 (0.86-1.27) |                          |

SUPPLEMENTARY DATA

**Supplementary Table S6. Association of current shift work and type 2 diabetes odds by chronotype.** OR=odds ratio, 95%CI= 95% confidence interval.

| Shift Work Status                                   | OR <sup>i</sup> 95%CI | P <sub>interaction</sub> <sup>j</sup> |
|-----------------------------------------------------|-----------------------|---------------------------------------|
| <b>Morning Types (N=61,131, 1,746 cases)</b>        |                       |                                       |
| Day workers                                         | 1.00 (Ref)            | 0.48                                  |
| Shift work, but never, rarely night shift work      | 1.15 (0.96-1.37)      |                                       |
| Irregular, rotating shifts with some night shifts   | 1.07 (0.85-1.33)      |                                       |
| Irregular, rotating shifts with usual night shifts  | 1.14 (0.74-1.71)      |                                       |
| Permanent night shift work                          | 0.86 (0.59-1.22)      |                                       |
| <b>Intermediate Types (N=152,997, 3,3576 cases)</b> |                       |                                       |
| Day workers                                         | 1.00 (Ref)            | 0.48                                  |
| Shift work, but never, rarely night shift work      | 1.14 (1.00-1.29)      |                                       |
| Irregular, rotating shifts with some night shifts   | 1.07 (0.91-1.26)      |                                       |
| Irregular, rotating shifts with usual night shifts  | 1.40 (1.07-1.82)      |                                       |
| Permanent night shift work                          | 1.21 (0.95-1.51)      |                                       |
| <b>Evening Types (N=21,879, 676 cases)</b>          |                       |                                       |
| Day workers                                         | 1.00 (Ref)            | 0.48                                  |
| Shift work, but never, rarely night shift work      | 1.11 (0.81-1.51)      |                                       |
| Irregular, rotating shifts with some night shifts   | 1.55 (1.08- 2.19)     |                                       |
| Irregular, rotating shifts with usual night shifts  | 1.53 (0.87-2.55)      |                                       |
| Permanent night shift work                          | 0.99 (0.67-1.42)      |                                       |

**Supplementary Table S7. Association of current shift work and type 2 diabetes odds by physical activity.** Stratification by median-split, cut-off of 26.57MET-hrs/week); OR=odds ratio, 95%CI= 95% confidence interval.

| Shift Work Status                                             | OR, 95%CI        | P <sub>interaction</sub> |
|---------------------------------------------------------------|------------------|--------------------------|
| <b>Low physical activity levels (N=132,464, 3,676 cases)</b>  |                  |                          |
| No current shift work                                         | 1.00 (Ref)       | 0.03                     |
| Shift work, but never, rarely night shift work                | 1.10 (0.96-1.26) |                          |
| Sometimes night shift work                                    | 1.35 (1.14-1.59) |                          |
| Usually night shift work                                      | 1.37(1.03-1.82)  |                          |
| Always night shift work                                       | 1.33 (1.05-1.66) |                          |
| <b>High physical activity levels (N=132,980, 3,094 cases)</b> |                  |                          |
| No current shift work                                         | 1.00 (Ref)       | 0.03                     |
| Shift work, but never, rarely night shift work                | 1.13 (0.99-1.28) |                          |
| Sometimes night shift work                                    | 0.98 (0.84-1.15) |                          |
| Usually night shift work                                      | 1.36 (1.05-1.75) |                          |
| Always night shift work                                       | 0.94 (0.75-1.16) |                          |

SUPPLEMENTARY DATA

**Supplementary Table S8. Individual type 2 diabetes SNP association with type 2 diabetes odds in the UK Biobank (N =180,704). \* SNPs included in the GRS<sub>10</sub>.**

| SNP          | Chr | BP        | Nearest Gene | EA/NEA | N      | OR (SE)       | P        |
|--------------|-----|-----------|--------------|--------|--------|---------------|----------|
| rs3768321    | 1   | 40035928  | MACF1        | T/G    | 180111 | 1.144 (0.028) | 1.72E-06 |
| rs12031920   | 1   | 51109269  | FAF1         | T/A    | 179957 | 1.004 (0.024) | 0.855    |
| rs67156297   | 1   | 154336716 | ATP8B2       | A/G    | 179166 | 1.041 (0.026) | 0.126    |
| rs340874     | 1   | 214159256 | PROX1        | C/T    | 180704 | 1.092 (0.024) | 2.06E-04 |
| rs145819220* | 2   | 27748539  | GCKR         | C/G    | 179568 | 1.122 (0.173) | 0.504    |
| rs6757251    | 2   | 43734847  | THADA        | C/T    | 180657 | 1.172 (0.04)  | 6.18E-05 |
| rs9309245    | 2   | 53397048  | ASB3         | C/G    | 179356 | 1.019 (0.025) | 0.438    |
| rs1116357    | 2   | 57287411  | CCDC85A      | G/A    | 179963 | 1.026 (0.023) | 0.264    |
| rs10193447   | 2   | 60552476  | BCL11A       | T/C    | 177419 | 1.015 (0.024) | 0.538    |
| rs6723108    | 2   | 135479980 | TMEM163      | T/G    | 180704 | 1.008 (0.023) | 0.719    |
| rs7560163    | 2   | 151637936 | RBM43/RND3   | C/G    | 180704 | 1.082 (0.24)  | 0.743    |
| rs1563575    | 2   | 161131694 | RBMS1        | G/A    | 179482 | 1.006 (0.026) | 0.830    |
| rs28584669   | 2   | 165689720 | GRB14        | T/C    | 178372 | 1.031 (0.032) | 0.343    |
| rs1861612    | 2   | 230522398 | DNER         | A/G    | 180483 | 1.025 (0.023) | 0.287    |
| rs11712037   | 3   | 12344730  | PPARG        | C/G    | 180149 | 1.108 (0.037) | 0.006    |
| rs35352848   | 3   | 23455582  | UBE2E2       | T/C    | 180495 | 1.14 (0.03)   | 1.18E-05 |
| rs79819696*  | 3   | 63944174  | PSMD6        | A/G    | 180538 | 1.019 (0.236) | 0.938    |
| rs7428936    | 3   | 64710850  | ADAMTS9      | T/C    | 180299 | 1.064 (0.024) | 0.010    |
| rs11708067   | 3   | 123065778 | ADCY5        | A/G    | 180704 | 1.096 (0.028) | 0.001    |
| rs4402960    | 3   | 185511687 | IGF2BP2      | T/G    | 180704 | 1.225 (0.024) | 1.27E-16 |
| rs9820223    | 3   | 186663868 | ST6GAL1      | C/T    | 175666 | 1.07 (0.024)  | 0.005    |
| rs6777684    | 3   | 187741842 | LPP          | G/A    | 177070 | 1.116 (0.024) | 7.73E-06 |
| rs1531583    | 4   | 744972    | MAEA         | T/G    | 180395 | 1.163 (0.057) | 0.008    |
| rs3821943    | 4   | 6299940   | WFS1         | T/C    | 177630 | 1.067 (0.024) | 0.006    |
| rs7660590    | 4   | 153397823 | TMEM154      | C/T    | 180437 | 1.015 (0.026) | 0.561    |
| rs60780116   | 4   | 185708807 | ACSL1        | T/C    | 179049 | 1.046 (0.033) | 0.166    |
| rs173964     | 5   | 55809465  | ANKRD55      | G/A    | 180594 | 1.077 (0.027) | 0.006    |
| rs9687833    | 5   | 55861601  | ANKRD55      | A/G    | 180537 | 1.088 (0.028) | 0.003    |
| rs6453287    | 5   | 76453765  | ZBED3        | C/A    | 180704 | 1.06 (0.025)  | 0.021    |
| rs78408340*  | 5   | 102338739 | PAM          | G/C    | 180704 | 1.637 (0.097) | 3.60E-07 |
| rs74944275   | 5   | 102726073 | PAM          | T/C    | 180704 | 1.092 (0.053) | 0.098    |
| rs6923241    | 6   | 7258847   | SSR1/RREB1   | T/C    | 177057 | 1.003 (0.026) | 0.909    |
| rs7451008    | 6   | 20673880  | CDKAL1       | C/T    | 179644 | 1.154 (0.026) | 2.84E-08 |
| rs2244020    | 6   | 31347451  | HLA-B        | G/A    | 180139 | 1.047 (0.025) | 0.063    |
| rs143308245* | 6   | 38228979  | ZFAND3       | T/A    | 180582 | 1.744 (0.613) | 0.364    |
| rs11759026   | 6   | 126792095 | CENPW        | G/A    | 179199 | 1.108 (0.027) | 1.74E-04 |
| rs10276674   | 7   | 14922007  | DGKB         | C/T    | 180704 | 1.114 (0.029) | 2.28E-04 |
| rs10238625   | 7   | 15054232  | DGKB         | A/G    | 179545 | 1.074 (0.024) | 0.003    |
| rs1635852    | 7   | 28189411  | JAZF1        | T/C    | 180704 | 1.087 (0.023) | 3.47E-04 |
| rs878521     | 7   | 44255643  | GCK          | A/G    | 179328 | 1.075 (0.027) | 0.007    |
| rs10229583   | 7   | 127246903 | PAX4         | A/G    | 179011 | 1.007 (0.027) | 0.797    |
| rs73455744*  | 7   | 127631181 | GCC1         | G/A    | 180640 | 1.268 (1.024) | 0.817    |
| rs791595     | 7   | 127862802 | MIR129-LEP   | G/A    | 180108 | 1.051 (0.031) | 0.109    |
| rs10954284   | 7   | 130463758 | KLF14        | T/A    | 180329 | 1.089 (0.023) | 2.59E-04 |
| rs1182436    | 7   | 157027753 | MNX1         | C/T    | 180391 | 1.129 (0.031) | 9.97E-05 |
| rs516946     | 8   | 41519248  | ANK1         | C/T    | 180704 | 1.085 (0.028) | 0.003    |
| rs4734285    | 8   | 95882365  | TP53INP1     | T/C    | 179473 | 1.038 (0.024) | 0.125    |
| rs11786613*  | 8   | 95957984  | TP53INP1     | C/A    | 179867 | 1.195 (0.089) | 0.046    |
| rs3802177    | 8   | 118185025 | SLC30A8      | G/A    | 180704 | 1.146 (0.026) | 1.15E-07 |
| rs10758593   | 9   | 4292083   | GLIS3        | A/G    | 180704 | 1.086 (0.024) | 4.77E-04 |
| rs10965223   | 9   | 22067004  | CDKN2A/B     | A/G    | 180523 | 1.049 (0.024) | 0.042    |

SUPPLEMENTARY DATA

|              |    |           |                       |     |        |               |          |
|--------------|----|-----------|-----------------------|-----|--------|---------------|----------|
| rs10965248   | 9  | 22132878  | <i>CDKN2A/B</i>       | T/C | 179918 | 1.21 (0.032)  | 3.14E-09 |
| rs10757282   | 9  | 22133984  | <i>CDKN2A/B</i>       | C/T | 180011 | 1.014 (0.024) | 0.552    |
| rs1575972    | 9  | 22301092  | <i>DMRTA1</i>         | T/A | 180602 | 1.042 (0.067) | 0.534    |
| rs13301067   | 9  | 81900744  | <i>TLE4</i>           | G/A | 180492 | 1.175 (0.051) | 0.002    |
| rs9410573    | 9  | 84311800  | <i>TLE1</i>           | T/C | 178226 | 1.123 (0.024) | 1.10E-06 |
| rs635634     | 9  | 136155000 | <i>ABO</i>            | T/C | 180704 | 1.013 (0.03)  | 0.656    |
| rs11787792   | 9  | 139252148 | <i>GP5M1</i>          | A/G | 180704 | 1.052 (0.025) | 0.041    |
| rs10998572   | 10 | 70859204  | <i>VPS26A</i>         | C/A | 179760 | 1.056 (0.049) | 0.270    |
| rs810517     | 10 | 80942620  | <i>ZMIZ1</i>          | C/T | 180662 | 1.118 (0.023) | 1.95E-06 |
| rs11187140   | 10 | 94466910  | <i>HHEX/IDE</i>       | G/A | 177633 | 1.172 (0.025) | 1.94E-10 |
| rs7903146*   | 10 | 114758349 | <i>TCF7L2</i>         | T/C | 180704 | 1.501 (0.024) | 6.55E-63 |
| rs10886471   | 10 | 121149403 | <i>GRK5</i>           | T/C | 180704 | 1.014 (0.023) | 0.541    |
| rs2292626    | 10 | 124186714 | <i>PLEKHA1</i>        | C/T | 180479 | 1.078 (0.023) | 0.001    |
| rs2334499    | 11 | 1696849   | <i>DUSP8</i>          | T/C | 180704 | 1.041 (0.024) | 0.085    |
| rs11564732   | 11 | 2150895   | <i>INS-IGF2</i>       | C/T | 179458 | 1.068 (0.089) | 0.456    |
| rs7107784    | 11 | 2215089   | <i>MIR4686</i>        | G/A | 180216 | 1.062 (0.025) | 0.018    |
| rs231360     | 11 | 2692249   | <i>KCNQ1</i>          | T/C | 178347 | 1.084 (0.024) | 0.001    |
| rs233449     | 11 | 2843803   | <i>KCNQ1</i>          | G/A | 180704 | 1.114 (0.027) | 4.64E-05 |
| rs2237897*   | 11 | 2858546   | <i>KCNQ1</i>          | C/T | 180704 | 1.35 (0.066)  | 4.89E-06 |
| rs441613     | 11 | 2910191   | <i>KCNQ1</i>          | C/T | 176579 | 1.009 (0.025) | 0.712    |
| rs5219       | 11 | 17409572  | <i>KCNJ11</i>         | T/C | 180704 | 1.072 (0.024) | 0.004    |
| rs1061810    | 11 | 43877934  | <i>HSD17B12</i>       | A/C | 180704 | 1.025 (0.025) | 0.329    |
| rs76550717   | 11 | 72428172  | <i>ARAP1 (CENTD2)</i> | A/G | 178012 | 1.12 (0.033)  | 0.001    |
| rs10830963   | 11 | 92708710  | <i>MTNR1B</i>         | G/C | 180704 | 1.119 (0.026) | 1.09E-05 |
| rs11063018   | 12 | 4288001   | <i>CCND2</i>          | C/T | 180704 | 1.057 (0.03)  | 0.067    |
| rs188827514* | 12 | 4291596   | <i>CCND2</i>          | A/G | 180238 | 1.481 (0.183) | 0.032    |
| rs4238013    | 12 | 4376089   | <i>CCND2</i>          | C/T | 178610 | 1.108 (0.028) | 3.16E-04 |
| rs7953190    | 12 | 27962719  | <i>KLHDC5</i>         | T/C | 180363 | 1.125 (0.03)  | 1.03E-04 |
| rs147538848  | 12 | 31466613  | <i>FAM60A</i>         | G/A | 180636 | 1.24 (1.024)  | 0.834    |
| rs2258238    | 12 | 66221060  | <i>HMG2A</i>          | T/A | 179459 | 1.104 (0.037) | 0.007    |
| rs6581998    | 12 | 71656723  | <i>TSPAN8/LGR5</i>    | C/T | 179581 | 1.028 (0.026) | 0.285    |
| rs56348580   | 12 | 121432117 | <i>HNF1A (TCF1)</i>   | G/C | 179192 | 1.048 (0.026) | 0.069    |
| rs2851437    | 12 | 123653592 | <i>MPHOSPH9</i>       | A/C | 174011 | 1.025 (0.028) | 0.363    |
| rs9552911*   | 13 | 23864657  | <i>SGCG</i>           | G/A | 180659 | 1.214 (0.464) | 0.676    |
| rs7330796    | 13 | 75898163  | <i>TBC1D4</i>         | T/C | 179730 | 1.023 (0.036) | 0.535    |
| rs11616380   | 13 | 80705315  | <i>SPRY2</i>          | G/T | 178080 | 1.153 (0.027) | 9.17E-08 |
| rs10146997   | 14 | 79945162  | <i>NRXN3</i>          | G/A | 180704 | 1.005 (0.028) | 0.848    |
| rs67839313   | 15 | 40619724  | <i>INAFM2</i>         | C/T | 180136 | 1.032 (0.037) | 0.400    |
| rs4774420    | 15 | 62117975  | <i>C2CD4A</i>         | C/T | 175008 | 1.008 (0.026) | 0.761    |
| rs952471     | 15 | 77776498  | <i>HMG20A</i>         | G/C | 180681 | 1.065 (0.026) | 0.015    |
| rs62006309   | 15 | 80411245  | <i>ZFAND6</i>         | A/G | 178786 | 1.03 (0.023)  | 0.204    |
| rs12595616   | 15 | 91563513  | <i>PRC1</i>           | C/T | 180414 | 1.066 (0.024) | 0.008    |
| rs1558902    | 16 | 53803574  | <i>FTO</i>            | A/T | 180607 | 1.059 (0.023) | 0.014    |
| rs8056814    | 16 | 75252327  | <i>BCAR1</i>          | G/A | 180065 | 1.225 (0.045) | 7.74E-06 |
| rs2925979    | 16 | 81534790  | <i>CMIP</i>           | T/C | 180704 | 1.059 (0.025) | 0.024    |
| rs9911305    | 17 | 2309188   | <i>SRR</i>            | A/G | 180473 | 1.07 (0.026)  | 0.009    |
| rs7224685    | 17 | 4014384   | <i>ZZEF1</i>          | T/G | 180180 | 1.037 (0.025) | 0.142    |
| rs13342692   | 17 | 6946287   | <i>SLC16A11/A13</i>   | T/C | 180704 | 1.037 (0.127) | 0.774    |
| rs78761021   | 17 | 9780387   | <i>GLP2R</i>          | G/A | 177577 | 1.039 (0.025) | 0.121    |
| rs757209     | 17 | 36102833  | <i>HNF1B (TCF2)</i>   | G/A | 178726 | 1.061 (0.024) | 0.012    |
| rs7234111    | 18 | 7067652   | <i>LAMA1</i>          | C/T | 180704 | 1.083 (0.024) | 0.001    |
| rs1942880    | 18 | 57793209  | <i>MC4R</i>           | T/C | 177594 | 1.014 (0.025) | 0.587    |
| rs79851087   | 18 | 58034883  | <i>MC4R</i>           | A/G | 180545 | 1.004 (0.087) | 0.962    |
| rs12454712   | 18 | 60845884  | <i>BCL2A</i>          | T/C | 180704 | 1.069 (0.024) | 0.006    |
| rs58489806   | 19 | 19456917  | <i>CILP2</i>          | T/C | 180138 | 1.125 (0.04)  | 0.003    |
| rs139990642* | 19 | 33943994  | <i>PEPD</i>           | A/G | 180437 | 1.229 (0.145) | 0.154    |

SUPPLEMENTARY DATA

|            |    |          |                      |     |        |               |          |
|------------|----|----------|----------------------|-----|--------|---------------|----------|
| rs429358   | 19 | 45411941 | <i>APOE</i>          | T/C | 180704 | 1.067 (0.033) | 0.051    |
| rs55864746 | 19 | 46160246 | <i>GIPR</i>          | A/G | 180529 | 1.11 (0.026)  | 4.32E-05 |
| rs12625671 | 20 | 42994812 | <i>HNF4A</i>         | C/T | 180704 | 1.081 (0.037) | 0.035    |
| rs1800961  | 20 | 43042364 | <i>HNF4A</i>         | T/C | 180704 | 1.322 (0.06)  | 2.79E-06 |
| rs2023681  | 22 | 30599562 | <i>MTMR3/HORMAD2</i> | G/A | 180655 | 1.132 (0.042) | 0.003    |
